# Supplementary material for: Natural Occurrence of Alternaria Toxins in the 2015 Wheat from Anhui Province, China
Source: PubMed Central journal article supplement (PMC5127105; doi:10.3390/toxins8110308), 2016-10-26
Supplement: toxins-08-00308-s001.pdf [file toxins-08-00308-s001.pdf]

# Supplementary Materials: Natural Occurrence of *Alternaria* Toxins in the 2015 Wheat from Anhui Province, China

Wenjing Xu, Xiaomin Han, Fengqin Li and Lishi Zhang

**Table S1.** The parameters associated with the calibration curve and method sensitivity for the detection of the four *Alternaria* toxins.

| Mycotoxin <sup>a</sup> | Regressive Equation        | Correlation Coefficient | LOD <sup>b</sup> (µg/kg) | LOQ <sup>c</sup> (µg/kg) |
|------------------------|----------------------------|-------------------------|--------------------------|--------------------------|
| TeA                    | $Y = 1952.99 X + 3227.47$  | 0.9999                  | 0.6                      | 1.9                      |
| TEN                    | $Y = 2598.29 X + 51,067.2$ | 0.9972                  | 0.1                      | 0.4                      |
| AOH                    | $Y = 1859.83 X + 4585.01$  | 0.9999                  | 1.3                      | 4.2                      |
| AME                    | $Y = 11388.87 X + 138,459$ | 0.9953                  | 0.04                     | 0.1                      |

<sup>a</sup> TeA = tenuazonic acid, TEN = tentoxin, AOH = alternariol, AME = alternariol methyl ether; <sup>b</sup> LOD = limit of detection; <sup>c</sup> LOQ = limit of quantification.

**Table S2.** The MRM parameters of MS/MS conditions.

| Mycotoxin | Parent Ion | Daughter Ion | Dwell Time (ms) | DP <sup>a</sup> (v) | CE <sup>b</sup> (v) | CXP <sup>c</sup> (v) | EP <sup>d</sup> (v) |
|-----------|------------|--------------|-----------------|---------------------|---------------------|----------------------|---------------------|
| TeA       | 196.0      | 138.8        | 50              | -87                 | -26                 | -10                  | -10                 |
|           | 196.0      | 111.8        | 50              | -83                 | -32                 | -11                  | -10                 |
| TEN       | 413.2      | 140.9        | 50              | -106                | -26                 | -10                  | -10                 |
|           | 413.2      | 271.0        | 50              | -106                | -22                 | -11                  | -10                 |
| AOH       | 256.9      | 212.9        | 50              | -114                | -30                 | -7                   | -10                 |
|           | 256.9      | 214.9        | 50              | -114                | -34                 | -8                   | -10                 |
| AME       | 270.9      | 255.8        | 50              | -106                | -40                 | -10                  | -10                 |
|           | 270.9      | 227.8        | 50              | -106                | -38                 | -8                   | -10                 |

<sup>a</sup> DP = declustering potential; <sup>b</sup> CE = collision energy; <sup>c</sup> CXP = collision cell exit potential; <sup>d</sup> EP = entrance potential.
